# Supplementary material
Source: PubMed Central journal article supplement (PMC3031479)

**Figure S1. BR cell lines show overexpression of PSMB5 protein**

PSMB5 expression in cytosolic fractions from PT and BR cell lines assessed by Western blot. PSMB5 expression ratio between PT and BR cells was calculated by densitometry using  $\beta$ -actin as a loading control.

**Figure S2. Absence of described PSMB5 mutations in HBL2 and JEKO BR**

PSMB5 gene was sequenced in HBL2 BR and JEKO BR. The nucleotides (322, 323, 326) where mutations have been described in other BR cell lines are marked with a red arrow.

Figure S1

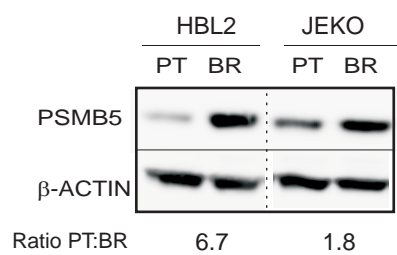

Figure S2

HBL2-BR

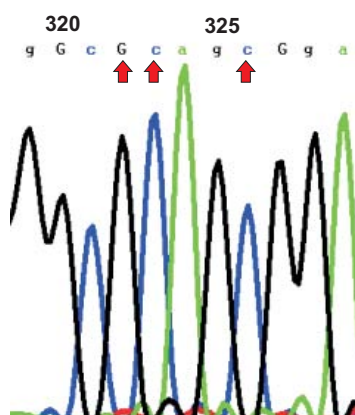

JEKO-BR

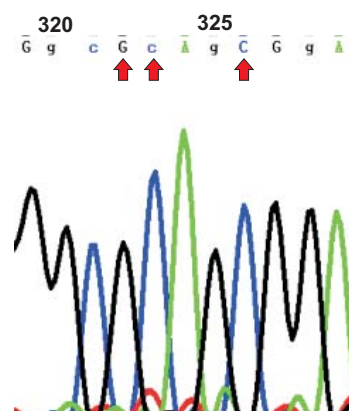

Supplement: blood-2010-02-269514_1.pdf [file blood-2010-02-269514_1.pdf]
